# Supplementary material for: TMEM120A/TACAN inhibits mechanically activated PIEZO2 channels
Source: PubMed Central journal article supplement — J Gen Physiol. 2022 Jul 12;154(8):e202213164. doi: 10.1085/jgp.202213164 (PMC9280072; doi:10.1085/jgp.202213164), 2022-07-12

Anti-TACAN Antibody - 1  
Sham-siRNA Tmem120a-siRNA

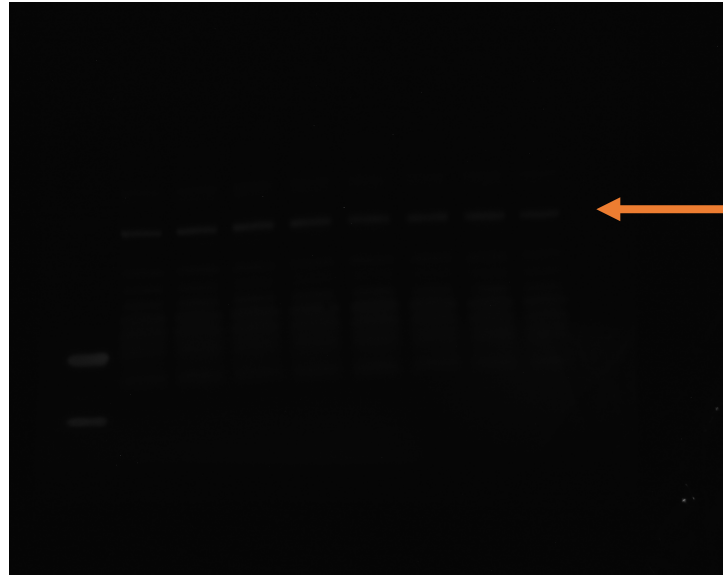

Anti-Tubulin Antibody - 1  
Sham-siRNA Tmem120a-siRNA

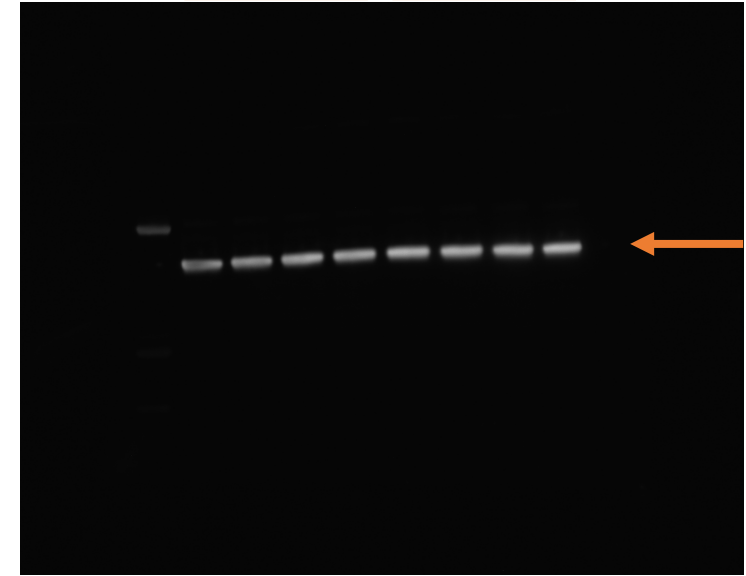

Anti-TACAN Antibody - 1  
Sham-siRNA Tmem120a-siRNA

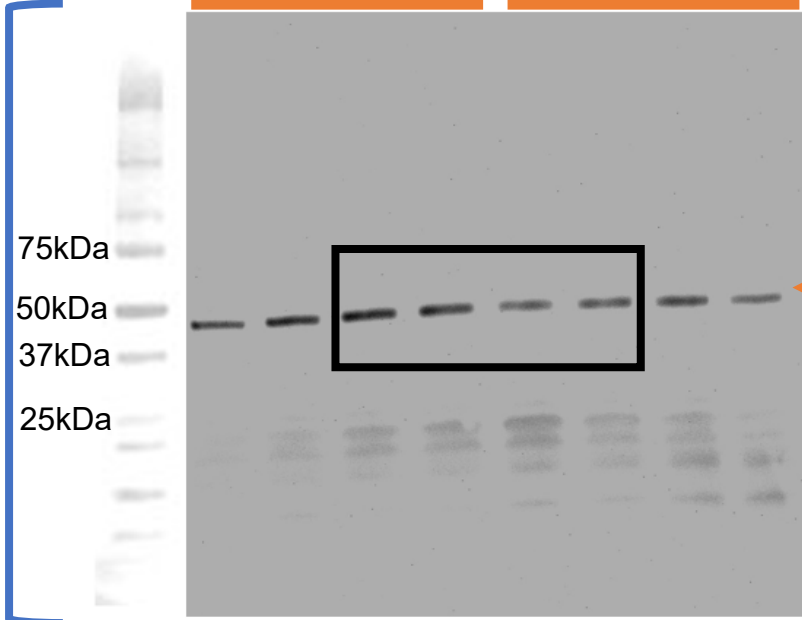

Anti-Tubulin Antibody - 1  
Sham-siRNA Tmem120a-siRNA

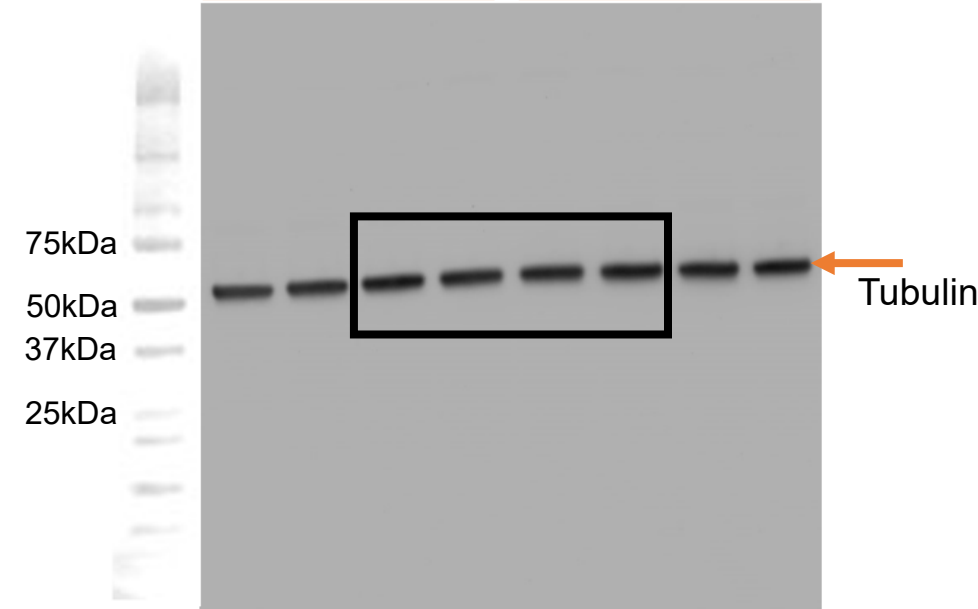

Raw blot images  
displayed here  
were analyzed.

Blot images  
displayed here had  
brightness/contrast  
adjusted for  
viewing clarity.

Raw blot images displayed here were analyzed.

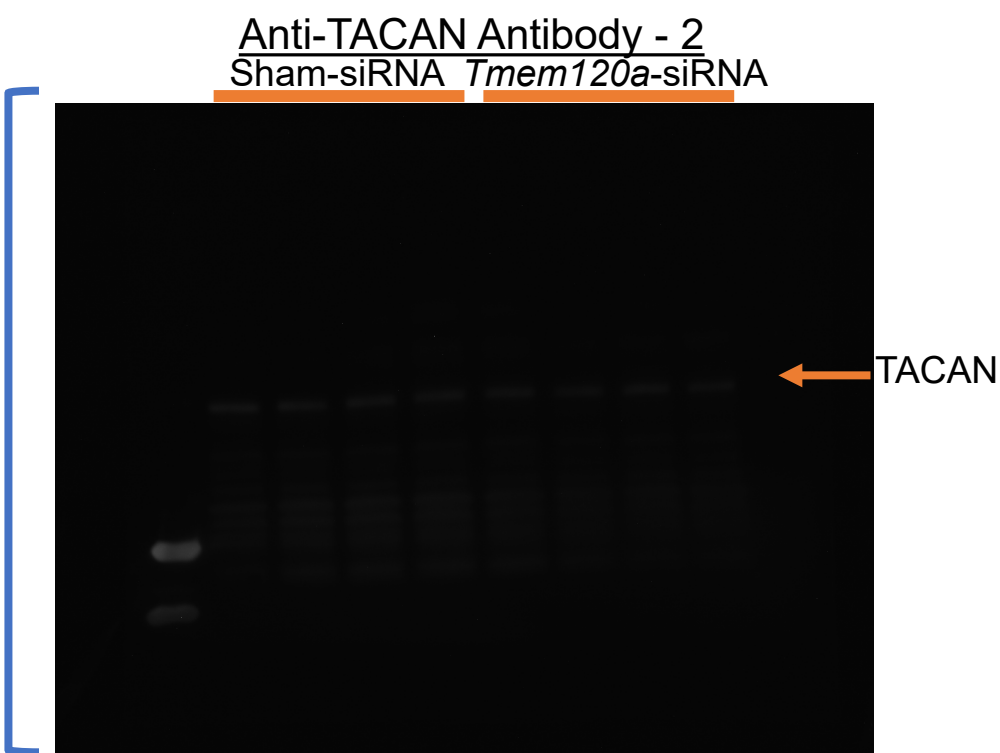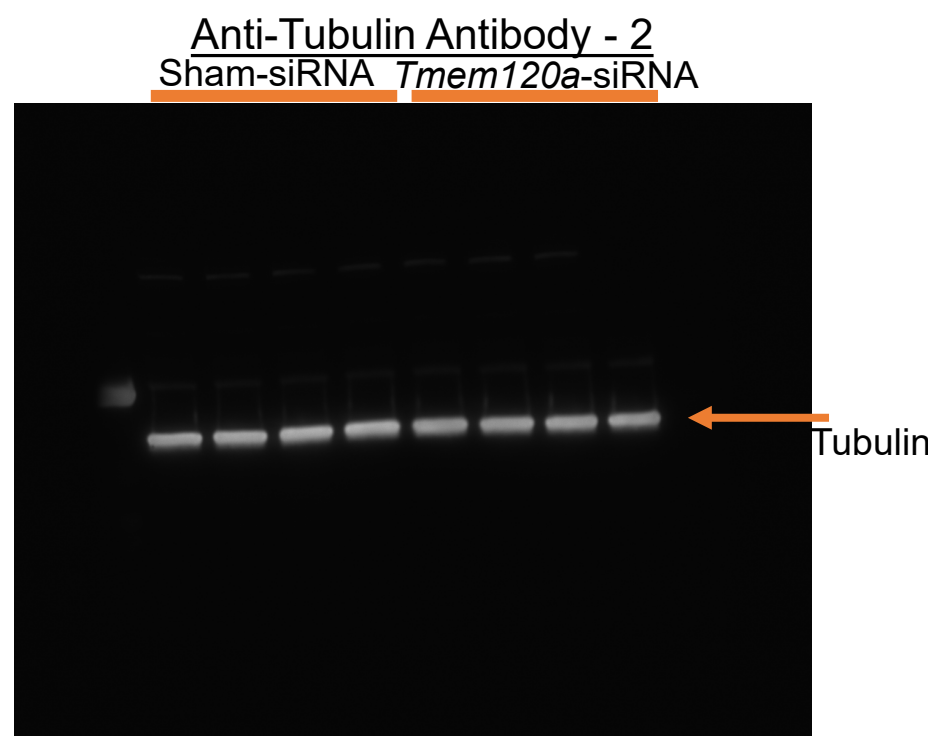

Blot images displayed here had brightness/contrast adjusted for viewing clarity.

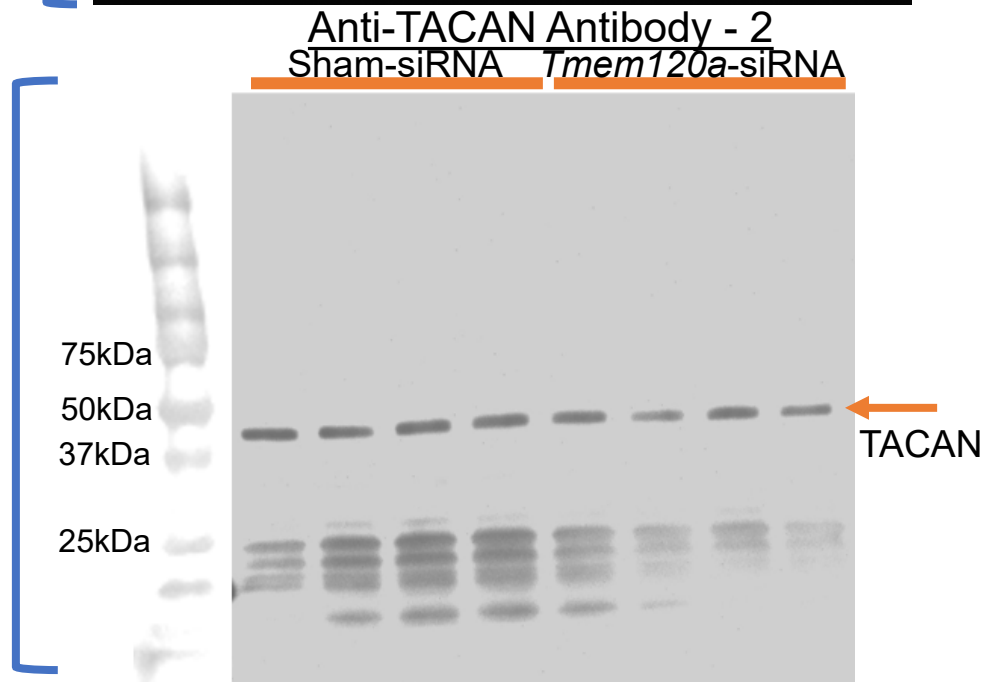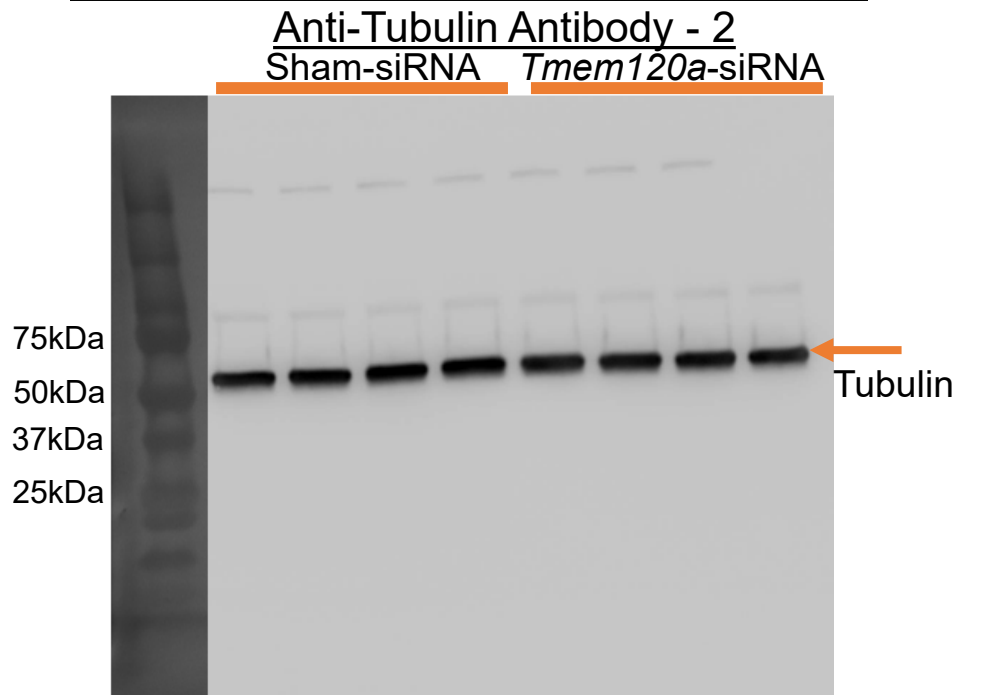

Raw blot images displayed here were analyzed.

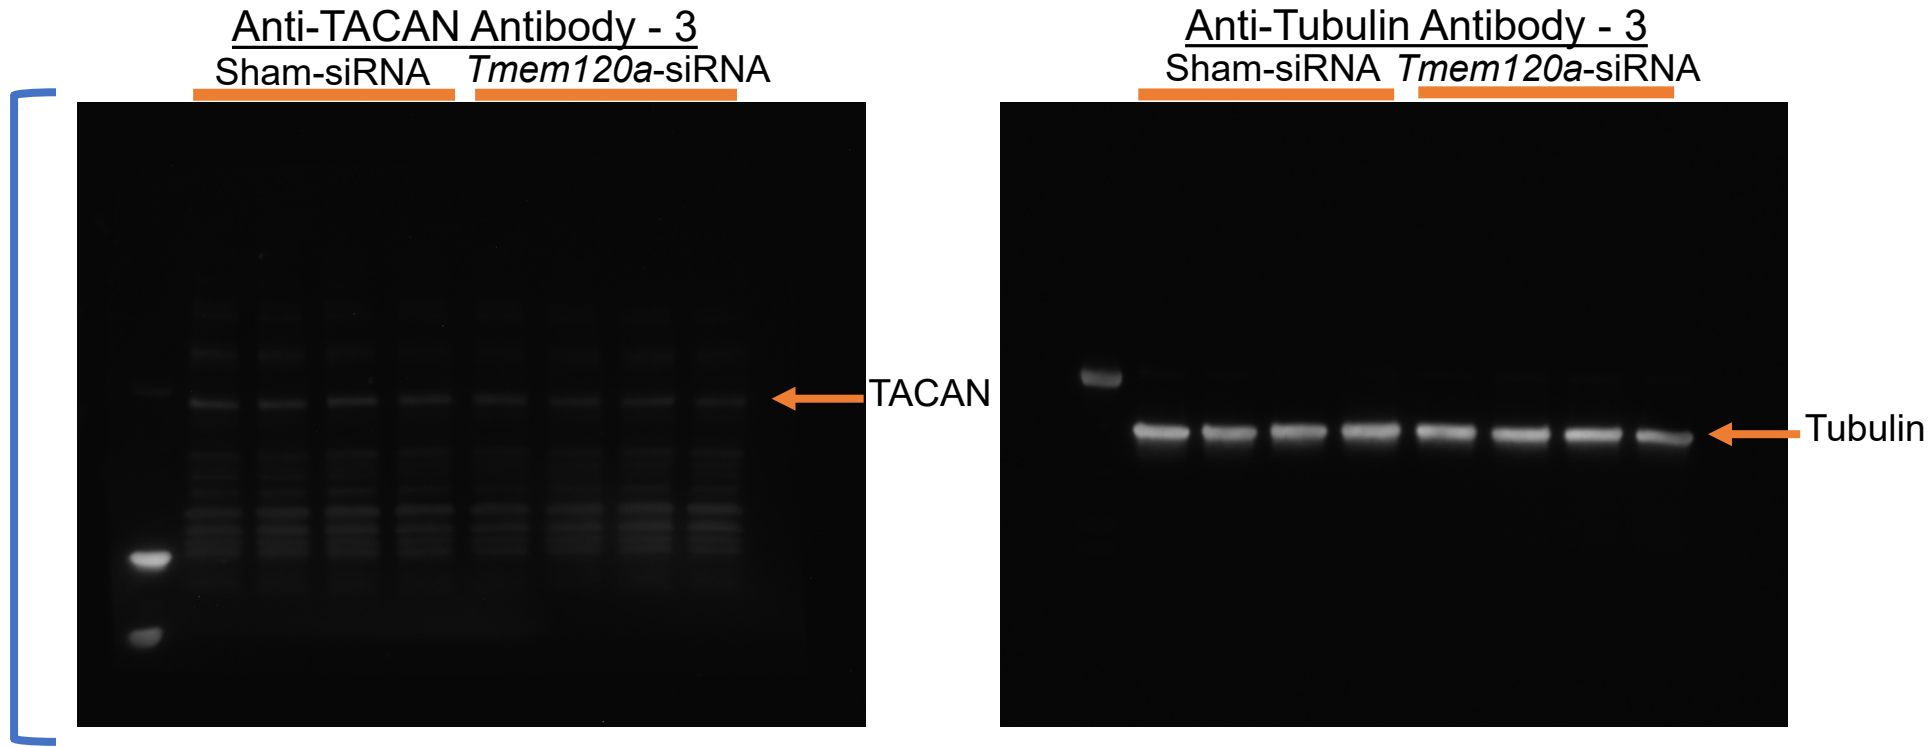

Blot images displayed here had brightness/contrast adjusted for viewing clarity.

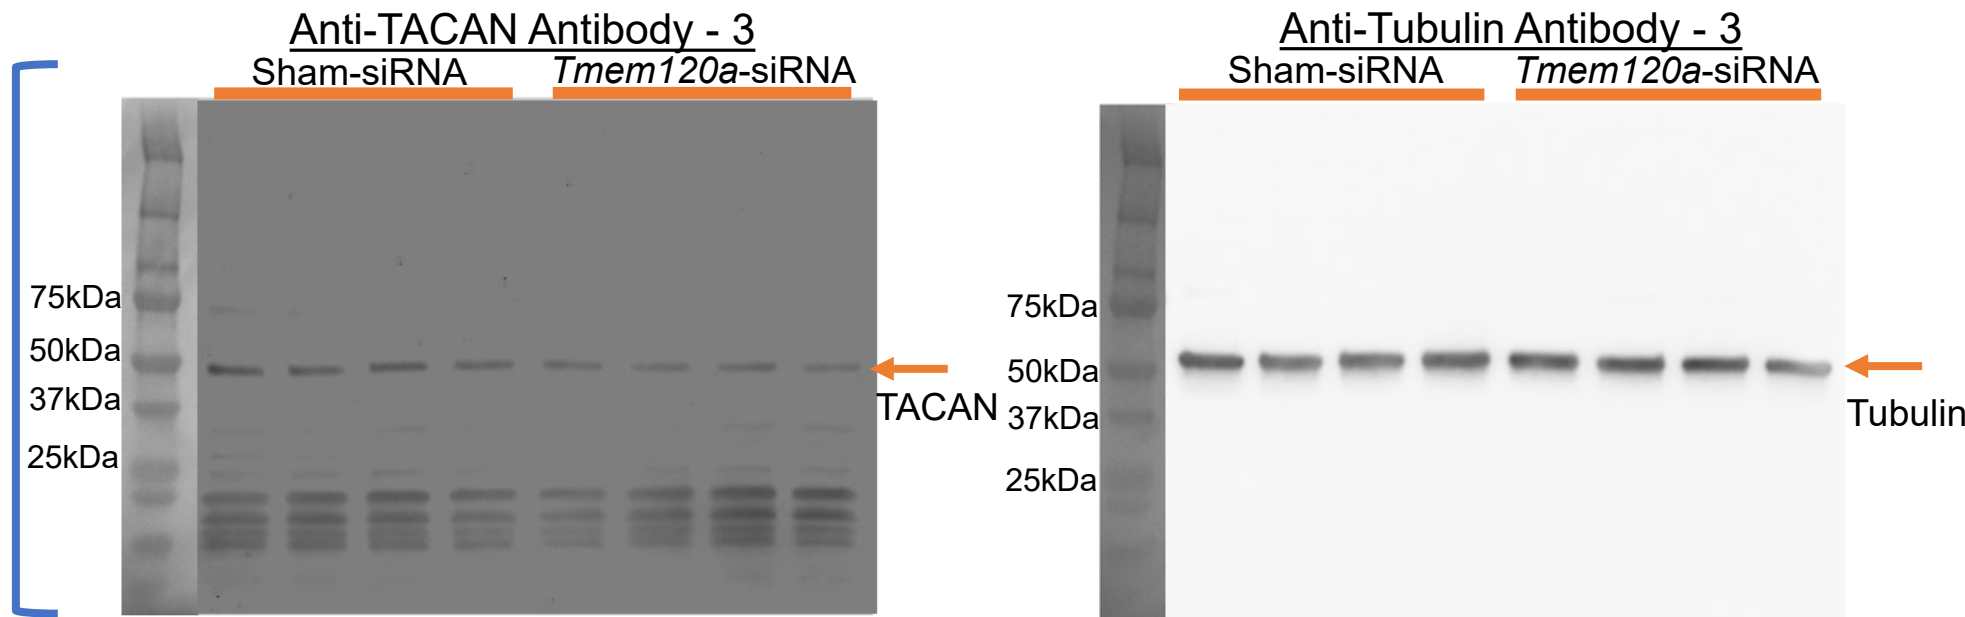

Supplement: JGP_202213164_SourceDataFS7.pdf [file JGP_202213164_SourceDataFS7.pdf]
